# Supplementary material for: The Psychological Impacts of COVID-19 Pandemic among Emerging Adults: An Observational Cross-Sectional Study
Source: Int J Environ Res Public Health. 2022 Jan 27;19(3):1445. doi: 10.3390/ijerph19031445 (PMC8835027; doi:10.3390/ijerph19031445)
Supplement: Supplementary file 1 [file ijerph-19-01445-s001.zip › ijerph-1518165-supplementary.pdf]

**Supplementary Table 1.** Proportions of participants with symptoms of mental health disease during the pandemic.

| Symptom                                                                                                                                                                   | Participant Experience <sup>‡</sup> |                                     |
|---------------------------------------------------------------------------------------------------------------------------------------------------------------------------|-------------------------------------|-------------------------------------|
|                                                                                                                                                                           | Warrants further inquiry (%)        | Doesn't warrant further inquiry (%) |
| Depression                                                                                                                                                                |                                     |                                     |
| How many days in the last 2 weeks have you had little interest or pleasure in doing things during the COVID-19 pandemic?                                                  | 314 (63.95)                         | 177 (36.05)                         |
| How much have you been bothered with feeling down, depressed, or hopeless for a period of TWO WEEKS during the COVID-19 pandemic? *                                       | 292 (59.47)                         | 198 (40.33)                         |
| Mania                                                                                                                                                                     |                                     |                                     |
| How much have you been bothered with sleeping less than usual, but still have a lot of energy for a period of TWO WEEKS during the COVID-19 pandemic? ***                 | 235 (47.86)                         | 253 (51.53)                         |
| How much have you been bothered with starting lots more projects than usual or doing more risky things than usual for a period of TWO WEEKS during the COVID-19 pandemic? | 245 (49.90)                         | 246 (50.10)                         |
| Anxiety                                                                                                                                                                   |                                     |                                     |
| How much have you been bothered with feeling nervous, anxious, frightened, worried, or on edge for a period of TWO WEEKS during the COVID-19 pandemic?                    | 254 (51.73)                         | 237 (48.27)                         |
| How much have you been bothered with avoiding situations that make you anxious for a period of TWO WEEKS during the COVID-19 pandemic?                                    | 243 (49.49)                         | 248 (50.51)                         |
| How much have you been bothered with feeling panic or being frightened for a period of TWO WEEKS during the COVID-19 pandemic?                                            | 231 (47.05)                         | 260 (52.95)                         |
| Personality functioning                                                                                                                                                   |                                     |                                     |
| How much have you been bothered with not feeling close to other people or enjoying your relationships with them for a period of TWO WEEKS during the COVID-19 pandemic?   | 256 (52.14)                         | 235 (47.86)                         |
| How much have you been bothered with not knowing who you really are or what you want out of life for a period of TWO WEEKS during the COVID-19 pandemic?                  |                                     |                                     |
| Somatic symptoms                                                                                                                                                          |                                     |                                     |
| How much have you been bothered with Unexplained aches and pains (e.g., head, back, joints, abdomen, legs) for a period of TWO WEEKS during the COVID-19 pandemic?        | 254 (51.73)                         | 237 (48.27)                         |

|                                                                                                                                                                                                                                                                                                                                                                                                                                                                         |             |             |
|-------------------------------------------------------------------------------------------------------------------------------------------------------------------------------------------------------------------------------------------------------------------------------------------------------------------------------------------------------------------------------------------------------------------------------------------------------------------------|-------------|-------------|
| How much have you been bothered with feeling that your illnesses are not being taken seriously enough for a period of TWO WEEKS during the COVID-19 pandemic? *                                                                                                                                                                                                                                                                                                         | 159 (32.38) | 331 (67.41) |
| Anger                                                                                                                                                                                                                                                                                                                                                                                                                                                                   |             |             |
| How much have you been bothered with feeling more irritated, grouchy, or angry than usual for a period of TWO WEEKS during the COVID-19 pandemic?                                                                                                                                                                                                                                                                                                                       | 264 (53.77) | 227 (46.23) |
| Sleep problems                                                                                                                                                                                                                                                                                                                                                                                                                                                          |             |             |
| How much have you been bothered with problems with sleep that affected your sleep quality over all for a period of TWO WEEKS during the COVID-19 pandemic? **                                                                                                                                                                                                                                                                                                           | 240 (48.88) | 249 (50.71) |
| Substance abuse                                                                                                                                                                                                                                                                                                                                                                                                                                                         |             |             |
| How much have you been bothered with using any of the following medicines ON YOUR OWN, that is, without a doctor's prescription, in greater amounts or longer than prescribed [e.g., painkillers (like panadol), stimulants (like Adderall, codeine), sedatives or tranquilizers (like sleeping pills or Valium), or drugs like marijuana, or cocaine, hallucinogens (like LSD), heroin, inhalants or solvents] for a period of TWO WEEKS during the COVID-19 pandemic? | 188 (38.29) | 303 (61.71) |
| How much have you been bothered with smoking any cigarettes, a cigar, or pipe, or using snuff or chewing tobacco for a period of TWO WEEKS during the COVID-19 pandemic?                                                                                                                                                                                                                                                                                                | 141 (28.72) | 350 (71.28) |
| How much have you been bothered with drinking at least 4 drinks of any kind of alcohol in a single day for a period of TWO WEEKS during the COVID-19 pandemic?                                                                                                                                                                                                                                                                                                          | 94 (19.14)  | 397 (80.85) |
| Repetitive thoughts and behaviors                                                                                                                                                                                                                                                                                                                                                                                                                                       |             |             |
| How much have you been bothered with Unpleasant thoughts, urges, or images that repeatedly enter your mind for a period of TWO WEEKS during the COVID-19 pandemic?                                                                                                                                                                                                                                                                                                      | 198 (40.33) | 293 (59.67) |
| How much have you been bothered with Feeling driven to perform certain behaviours or mental acts over and over again for a period of TWO WEEKS during the COVID-19 pandemic?                                                                                                                                                                                                                                                                                            | 169 (34.42) | 322 (65.58) |
| Psychosis                                                                                                                                                                                                                                                                                                                                                                                                                                                               |             |             |
| How much have you been bothered with feeling that someone could hear your thoughts, or that you could hear what another person was thinking for a period of TWO WEEKS during the COVID-19 pandemic?                                                                                                                                                                                                                                                                     | 183 (37.27) | 308 (62.73) |
| How much have you been bothered with hearing things other people couldn't hear, such as voices even when no one was around for a period of TWO WEEKS during the COVID-19 pandemic? *                                                                                                                                                                                                                                                                                    | 172 (35.03) | 318 (64.77) |
| Dissociation                                                                                                                                                                                                                                                                                                                                                                                                                                                            |             |             |

|                                                                                                                                                                                                        |                  |                   |
|--------------------------------------------------------------------------------------------------------------------------------------------------------------------------------------------------------|------------------|-------------------|
| How much have you been bothered with feeling detached or distant from yourself, your body, your physical surroundings, or your memories for a period of TWO WEEKS during the COVID-19 pandemic?        | 204 (41.55)      | 287 (58.45)       |
| Memory                                                                                                                                                                                                 |                  |                   |
| How much have you been bothered with problems with memory (e.g., learning new information) or with location (e.g., finding your way home) for a period of TWO WEEKS during the COVID-19 pandemic? **** | 186 (37.88)      | 305 (62.12)       |
| Suicidal ideation                                                                                                                                                                                      |                  |                   |
| In the past week, have you been having thoughts about killing yourself?                                                                                                                                | Yes<br>32 (6.52) | No<br>459 (93.48) |

\*Missing 1 response \*\*Missing 2 responses , \*\*\*\* missing 3 responses; † Pyschosis, Suidical ideation and substance abuse: 1) Slight- Rare, less than a day or two ; 2) Mild- Several days; 3) Moderate- More than half the days; 4) Severe- Nearly every day all warrant further inquiry. 0) None- Not at all does not warrant further inquiry. All other domains: 2) Mild- Several days; 3) Moderate- More than half the days; 4) Severe- Nearly every day all warrant further inquiry. 0) None- Not at all & 1) Slight- Rare, less than a day or two do not warrant further inquiry.
